# Supplementary material for: Comparing proficiency of obstetrics and gynaecology trainees with general surgery trainees using simulated laparoscopic tasks in Health Education England, North-West: a prospective observational study
Source: HighWire-hosted journal article supplement (doi:10.1136/bmjopen-2023-075113), 2023-11-01
Supplement: bmjopen-2023-075113supp002_data_supplement.pdf [file bmjopen-2023-075113supp002_data_supplement.pdf]

**Table S2:** Summary of required procedures in GS training. Indicative case/operative numbers are given for the specialty training phase where both the numbers and entrustability scales are used for assessment.

|                                                                                                                                                                                                                                                        | CT1<br>Phase<br>1 | CT2<br>Phase 1                                                                                                                                                                                                                                  | ST3<br>Phase<br>2 | ST4<br>Phase<br>2 | ST5<br>Phase<br>2 | ST6<br>Phase 2                                                                                                                                                                                 | ST7<br>Phase<br>3 | ST8<br>Phase 3                                                                                                                                                            |
|--------------------------------------------------------------------------------------------------------------------------------------------------------------------------------------------------------------------------------------------------------|-------------------|-------------------------------------------------------------------------------------------------------------------------------------------------------------------------------------------------------------------------------------------------|-------------------|-------------------|-------------------|------------------------------------------------------------------------------------------------------------------------------------------------------------------------------------------------|-------------------|---------------------------------------------------------------------------------------------------------------------------------------------------------------------------|
| Examinations                                                                                                                                                                                                                                           |                   | MRCS Part A<br>MRCS Part B                                                                                                                                                                                                                      |                   |                   |                   |                                                                                                                                                                                                |                   | FRCS Part 1<br>FRCS Part 2                                                                                                                                                |
| <b>Operative Requirements</b><br><u>Level 1</u><br>Has observed<br><u>Level 2</u><br>Can do with assistance<br><u>Level 3</u><br>Can do whole but may need assistance<br><u>Level 4</u><br>Competent to do without assistance, including complications |                   | Induction of pneumoperitoneum for laparoscopy with port placement (Level 2)<br>Appendicectomy (Level 3)<br>Open and close midline laparotomy incision (2)<br>Inguinal hernia repair (Level 2)<br>Primary abdominal wall hernia repair (Level 2) |                   |                   |                   | Inguinal Hernia (level 4) [50 cases*]<br>Cholecystectomy ( level 3) [40 cases*]<br>Segmental Colectomy (level 3) [15 cases*]<br>Emergency Laparotomy [45* cases]<br>Appendicectomy [60 cases*] |                   | Emergency Laparotomy (Level 4) [100 cases*]<br>Appendicectomy (Level 4) [80 cases*]<br>Cholecystectomy [50 cases*] (level 4)<br>Segmental colectomy [20 cases*] (level 4) |
| <b>Other Operative Technical Skills</b>                                                                                                                                                                                                                |                   | Chest drain insertion (Level 3)<br>Needle biopsy including fine needle aspiration (Level 3)<br>Rigid sigmoidoscopy (Level 3)<br>Excision biopsy of benign skin or subcutaneous lesion (Level 4)                                                 |                   |                   |                   |                                                                                                                                                                                                |                   | Indicative numbers and competencies for chosen specialty required.<br>(Hepatopancreaticobiliary, Transplant, Endocrine, Colorectal, Oesophagogastric)                     |
